# Supplementary material for: Current Knowledge of the Potential Links between Inflammation and Prostate Cancer
Source: MDPI journal article supplement (doi:10.3390/ijms20153833), 2019-08-06
Supplement: s1 [file s1]

|                     |                            |                              |                                                                                                                                                                                                                                                                                                          |                                                   |
|---------------------|----------------------------|------------------------------|----------------------------------------------------------------------------------------------------------------------------------------------------------------------------------------------------------------------------------------------------------------------------------------------------------|---------------------------------------------------|
| <b>Brawn, 1991</b>  | Minimal to no inflammation |                              | Occasional inflammatory cells, usually lymphocytes, primarily in stroma with minimal involvement of prostatic glands                                                                                                                                                                                     |                                                   |
|                     | Moderate                   |                              | Involving larger portion of prostate; acute, chronic or both, occupying less than one low-power (5-mm) microscopic field                                                                                                                                                                                 |                                                   |
|                     | Severe                     |                              | Acute, chronic, or both, filling at least one low-power microscopic field                                                                                                                                                                                                                                |                                                   |
| <b>Nadler, 1995</b> | Type of inflammation       | Acute prostatitis            | Polymorphonuclear leukocytes in glandular or ductal lumina, their epithelium and/or adjacent stroma                                                                                                                                                                                                      |                                                   |
|                     |                            | Chronic prostatitis          | Mononuclear cell infiltrate (lymphocytes, monocytes and plasma cells) in prostatic stroma, with inflammatory cells occasionally invading glandular epithelium                                                                                                                                            |                                                   |
|                     | Grade of inflammation      | 0 (Any)                      | Not otherwise specified                                                                                                                                                                                                                                                                                  |                                                   |
|                     |                            | 1 (Low)                      | Not otherwise specified                                                                                                                                                                                                                                                                                  |                                                   |
|                     |                            | 2 (High)                     | Not otherwise specified                                                                                                                                                                                                                                                                                  |                                                   |
| <b>Irani, 1997</b>  | Extent                     | 0                            | No inflammatory cells                                                                                                                                                                                                                                                                                    |                                                   |
|                     |                            | 1                            | Scattered inflammatory cell infiltrate                                                                                                                                                                                                                                                                   |                                                   |
|                     |                            | 2                            | Non-confluent lymphoid nodules                                                                                                                                                                                                                                                                           |                                                   |
|                     |                            | 3                            | Large inflammatory areas with confluence of infiltrate                                                                                                                                                                                                                                                   |                                                   |
|                     | Aggressiveness             | 0                            | No contact between inflammatory cells and glandular epithelium                                                                                                                                                                                                                                           |                                                   |
|                     |                            | 1                            | Contact between inflammatory cells and glandular epithelium                                                                                                                                                                                                                                              |                                                   |
|                     |                            | 2                            | Glandular epithelium disruption in <25% of examined material                                                                                                                                                                                                                                             |                                                   |
|                     |                            | 3                            | Glandular epithelium disruption in >25% of examined material                                                                                                                                                                                                                                             |                                                   |
| <b>Anim, 1998</b>   | Type of inflammation       | Acute prostatitis            | Foci of active glandular destruction with epithelial necrosis, presence of neutrophils and cellular debris in glandular lumen. Large numbers of neutrophils, macrophages and lymphocytes in stroma surrounding damaged glands. Small foci of chronic prostatitis may occur                               |                                                   |
|                     |                            | Chronic inactive prostatitis | Damaged gland regeneration. Periglandular fibrosis common. Inflammatory infiltrate less florid than in chronic active prostatitis with lymphoid follicles occupying sites of completely destroyed glands                                                                                                 |                                                   |
|                     |                            | Chronic active prostatitis   | Chronic inflammatory foci, areas of glandular destruction with periglandular infiltrates of lymphocytes and scattered macrophages. Partial necrosis or regeneration of glandular epithelium with inflammatory cells in epithelial layers. Secretion or corpora amylacea usually seen in glandular lumina |                                                   |
|                     | Distribution of cells      | Periglandular                |                                                                                                                                                                                                                                                                                                          |                                                   |
|                     |                            | Scattered                    |                                                                                                                                                                                                                                                                                                          |                                                   |
|                     |                            | Follicle centre              |                                                                                                                                                                                                                                                                                                          |                                                   |
|                     |                            | Perifollicular               |                                                                                                                                                                                                                                                                                                          |                                                   |
|                     |                            | Lining cells                 |                                                                                                                                                                                                                                                                                                          |                                                   |
|                     |                            | Lumen cells                  |                                                                                                                                                                                                                                                                                                          |                                                   |
|                     | <b>True, 1999</b>          | Density                      | Mild                                                                                                                                                                                                                                                                                                     | <10 inflammatory cells per 1-mm microscopic field |
| Moderate            |                            |                              | 10-200 inflammatory cells per 1-mm. microscopic field                                                                                                                                                                                                                                                    |                                                   |
| Severe              |                            |                              | >200 inflammatory cells per 1-mm. microscopic field                                                                                                                                                                                                                                                      |                                                   |
| Location            |                            | Glandular                    | In the lumina of or epithelium lining the glands                                                                                                                                                                                                                                                         |                                                   |
|                     |                            | Periglandular                | Within 50µm. of gland (s)                                                                                                                                                                                                                                                                                | Focal (only 1 gland)                              |
|                     |                            |                              |                                                                                                                                                                                                                                                                                                          | Multifocal (multiple glands)                      |

|                     |                                                                                             |                                                                                                                                                           |                                                                                                                          |                                                |
|---------------------|---------------------------------------------------------------------------------------------|-----------------------------------------------------------------------------------------------------------------------------------------------------------|--------------------------------------------------------------------------------------------------------------------------|------------------------------------------------|
|                     |                                                                                             | Stromal:                                                                                                                                                  | In prostatic stroma, not centered around glands)                                                                         | Focal (restricted to a 1-mm microscopic field) |
|                     |                                                                                             |                                                                                                                                                           |                                                                                                                          | Multifocal                                     |
|                     |                                                                                             |                                                                                                                                                           |                                                                                                                          | Diffuse                                        |
| <b>Irani, 1999</b>  | High-grade                                                                                  | Inflammatory cell nodules with confluence of infiltrate and/or clear glandular epithelium disruption associated with interstitial inflammatory infiltrate |                                                                                                                          |                                                |
|                     | Low-grade                                                                                   | Absence of any of the criteria for high-grade inflammation                                                                                                |                                                                                                                          |                                                |
| <b>Nickel, 1999</b> | Pattern                                                                                     | Glandular                                                                                                                                                 |                                                                                                                          |                                                |
|                     |                                                                                             | Periglandular                                                                                                                                             |                                                                                                                          |                                                |
|                     |                                                                                             | Stromal                                                                                                                                                   |                                                                                                                          |                                                |
|                     | Grade                                                                                       | 1                                                                                                                                                         |                                                                                                                          |                                                |
|                     |                                                                                             | 2                                                                                                                                                         |                                                                                                                          |                                                |
|                     |                                                                                             | 3                                                                                                                                                         |                                                                                                                          |                                                |
| <b>Nickel, 2001</b> | Anatomic location (Histologic pattern)                                                      | Glandular                                                                                                                                                 | Inflammatory infiltrates in duct/gland epithelium and/or lumina                                                          |                                                |
|                     |                                                                                             | Periglandular                                                                                                                                             | Inflammatory infiltrates in stroma, around prostatic ducts/glands, within 50 $\mu$ m distance                            |                                                |
|                     |                                                                                             | Stromal                                                                                                                                                   | Inflammatory cells in prostatic stroma, not centered around prostatic glands/ducts and $\geq$ 50 $\mu$ m distant         |                                                |
|                     | Extent (Tissue area involved by inflammatory cell infiltrates)                              | Focal                                                                                                                                                     | <10%                                                                                                                     |                                                |
|                     |                                                                                             | Multifocal                                                                                                                                                | 10-50%                                                                                                                   |                                                |
|                     |                                                                                             | Diffuse                                                                                                                                                   | >50%                                                                                                                     |                                                |
|                     | Grade (Morphologic description – typical inflammatory cell density, cells/mm <sup>2</sup> ) | 1/mild                                                                                                                                                    | Individual inflammatory cells separated by distinct intervening spaces (<100)                                            |                                                |
|                     |                                                                                             | 2/moderate                                                                                                                                                | Confluent sheets of inflammatory cells without tissue destruction nor lymphoid nodule/follicle formation (100 $\pm$ 500) |                                                |
|                     |                                                                                             | 3/severe                                                                                                                                                  | Confluent sheets of inflammatory cells with tissue destruction or nodule/follicle formation (>500)                       |                                                |

**Table 1.** Histologic classification systems for prostate inflammation according to the literature.
